# Supplementary material for: Blockade of Wnt/β-Catenin Pathway Aggravated Silica-Induced Lung Inflammation through Tregs Regulation on Th Immune Responses
Source: Hindawi journal article supplement (doi:10.1155/2016/6235614), 2016-01-01
Supplement: f1 [file 6235614.f1.pdf]

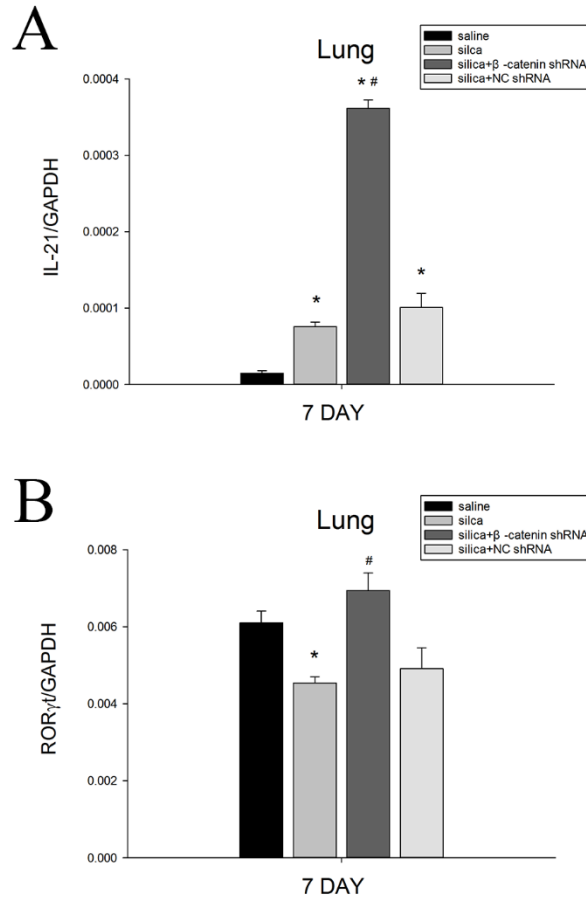

**Fig. S1. Th17 response was enhanced by blocking the Wnt/ $\beta$ -catenin pathway.** Expression of IL-21 (A) and ROR $\gamma$ t (B) in lung were assayed by realtime RT-PCR using the  $-\Delta\Delta C_t$  method. Values are shown as mean $\pm$ SEM (n=4-5). (\*, as compared with saline group at the same time point,  $p<0.05$ ; #, as compared with silica group and silica+NC shRNA group at the same time point,  $p<0.05$ ).
